# A Novel Protein Elicitor (PaNie) from *Pythium aphanidermatum* Induces Multiple Defense Responses in Carrot, Arabidopsis, and Tobacco<sup>1</sup>

Stefan Veit, Jörg Manfred Wörle, Thorsten Nürnberger, Wolfgang Koch, and Hanns Ulrich Seitz\*

Center for Plant Molecular Biology, Department of Plant Physiology, University of Tübingen, Auf der Morgenstelle 1, D-72076 Tübingen, Germany (S.V., J.M.W., W.K., H.U.S); and Institute of Plant Biochemistry, Weinberg 3, 06120 Halle/Saale, Germany (T.N.)

A novel protein elicitor (PaNie<sub>234</sub>) from *Pythium aphanidermatum* (Edson) Fitzp. was purified, microsequenced, and the corresponding cDNA was cloned. The deduced amino acid sequence contains a putative eukaryotic secretion signal with a proteinase cleavage site. The heterologously expressed elicitor protein without the secretion signal of 21 amino acids (PaNie<sub>213</sub>) triggered programmed cell death and de novo formation of 4-hydroxybenzoic acid in cultured cells of carrot (*Daucus carota*). Programmed cell death was determined using the tetrazolium assay and DNA laddering. Infiltration of PaNie<sub>213</sub> into the intercellular space of leaves of Arabidopsis (Columbia-0, wild type) resulted in necroses and deposition of callose on the cell walls of spongy parenchyma cells surrounding the necrotic mesophyll cells. Necroses were also formed in tobacco (*Nicotiana tabacum* cv Wisconsin W38, wild type) and tomato (*Lycopersicon esculentum* Mill.) but not in maize (*Zea mays*), oat (*Avena sativa*), and *Tradescantia zebrina* (Bosse), indicating that monocotyledonous plants are unable to perceive the signal. The reactions observed after treatment with the purified PaNie<sub>213</sub> were identical to responses measured after treatment with a crude elicitor preparation from the culture medium of *P. aphanidermatum*, described previously. The availability of the pure protein offers the possibility to isolate the corresponding receptor and its connection to downstream signaling-inducing defense reactions.

Plants are able to defend themselves successfully with a complex set of preformed structures and inducible reactions. The inducible reactions require the perception of either plant-derived (endogenous) or pathogen-derived (exogenous) signal molecules. These so-called elicitors are of diverse chemical nature and include proteins, peptides, glycoproteins, lipids, and oligosaccharides (Nürnberger, 1999). Elicitors trigger plant defense responses that are part of the basic or non-host resistance of plants (Nürnberger, 1999). Defense is often associated with localized hypersensitive cell death (Mittler et al., 1997) and the de novo formation of low-M<sub>r</sub> antimicrobial compounds called phytoalexins (Hammond-Kosack and Jones, 1996). The reinforcement of cell wall constituents is also part of the defense response (Bruce and West, 1989). The structural and cultivar specificity of elicitors and their ability to trigger plant defense responses at very low concentrations strongly suggest the existence of receptors at the plasma membrane and a downstream signal transduction cascade

(Ebel and Cosio, 1994). Despite many years of work, there are very few cases described in which the causal link between elicitors from oomycetes and putative receptors or high-affinity binding sites has unequivocally been linked to induced defense responses (Nennstiel et al., 1998). To study the elicitor-receptor interaction and the downstream signaling, pure elicitor molecules are necessary prerequisites.

Protein elicitors have been found in bacterial pathogens as well as in oomycetes and ascomycetes (Ebel and Cosio, 1994). Gram-negative phytopathogenic bacteria like *Erwinia amylovora* and *Pseudomonas syringae* secrete proteins, which induce a hypersensitive response, the so-called harpins (Wei et al., 1992; He et al., 1993). Bacterial flagellin and the corresponding receptor-like kinase were found more recently to induce defense responses (Felix et al., 1999; Gómez-Gómez and Boller, 2000).

In the order of *Peronosporales*, protein elicitors with a relative molecular mass of 10 kD and necrosis-inducing activity were identified and designated the elicitins (Ponchet et al., 1999). The race-specific Avr9-peptide from *Cladosporium fulvum* is responsible for the induction of active defense responses in tomato (*Lycopersicon esculentum* Mill.) cell cultures (May et al., 1996).

The cell wall of *Phytophthora sojae* contains a 42-kD glycoprotein that induces the activation of defense-related genes in parsley (Nürnberger et al., 1994). The

<sup>1</sup> This work was supported by the Deutsche Forschungsgemeinschaft (grant no. Se 229/19-1) and by the Land Baden-Württemberg (grant to W.K.).

\* Corresponding author; e-mail h.u.seitz@zmbp.uni-tuebingen.de; fax 49-7071-29-3287.

Article, publication date, and citation information can be found at [www.plantphysiol.org/cgi/doi/10.1104/pp.010350](http://www.plantphysiol.org/cgi/doi/10.1104/pp.010350).

active part of this glycoprotein is an internal peptide of 13 amino acids (Pep-13; Hahlbrock et al., 1995). From *Phytophthora parasitica*, an elicitor-active protein (Pp-elicitor) has been described recently that activates defense responses in parsley suspension cultures similar to those induced by the Pep-25 elicitor, containing the sequence of Pep-13 (Felbrich et al., 2000).

A 24-kD (Nep1) necrosis- and ethylene-inducing protein has been purified from culture filtrates of *Fusarium oxysporum* f. sp. *erythroxyli* (Bailey, 1995). When applied to weed species as a foliar spray it causes necrosis (Jennings et al., 2000).

*Pythium aphanidermatum* is a cosmopolitan pathogen with a wide host range causing economic losses on several important crops. *P. aphanidermatum* infects preferably juvenile tissues like seedling stems. Suspension-cultured hyphae of *P. aphanidermatum* release a variety of elicitor-active molecules into the culture medium. Among these elicitors are carbohydrates as well as proteins (Schnitzler 1992). In carrot (*Daucus carota*) cell cultures, and protoplasts derived from the cultured cells, these elicitors induce the de novo formation of 4-hydroxybenzoic acid (4-HBA). In intact cells, this compound is transferred to the cell wall and covalently linked to cell wall constituents, whereas in protoplasts lacking cell walls, the compound is secreted in a conjugated form into the culture medium (Schnitzler and Seitz, 1989). The carrot system described here reflects a non-host interaction or a basic resistance. The formation of active Phe ammonia-lyase (PAL) is necessary for 4-HBA synthesis and the elicitor induces the synthesis on a transcriptional level (Koch et al., 1998). The *P. aphanidermatum*-derived elicitor also induces programmed cell death in carrot cell cultures (Koch et al., 1998). Using an assay for loss of carrot cell viability, a 25-kD protein with elicitor activity was identified and partially purified (Koch et al., 1998). Using this crude elicitor preparation and specific inhibitors, several components of the signal transduction pathway have been identified. It was shown that an increase of cytoplasmic calcium concentration is essential for cell death induction and 4-HBA synthesis (Bach et al., 1993; Koch et al., 1998) and it was also demonstrated by these inhibitor experiments that G proteins are involved in signal transduction leading to programmed cell death, but not to 4-HBA accumulation (Koch et al., 1998).

To rule out effects of contaminating proteins and carbohydrates in the crude preparation, a pure elicitor protein is necessary. In the present paper, we describe the isolation of a cDNA encoding the elicitor protein (PaNie<sub>234</sub>) from *P. aphanidermatum*. The protein contains 234 amino acids and has a putative eukaryotic secretion signal harboring a proteinase cleavage site. The mature elicitor protein without the secretion signal (PaNie<sub>213</sub>) consists of 213 amino acids. PaNie<sub>213</sub> has been heterologously expressed in

*Escherichia coli* and can be detected by a rabbit anti-serum raised against the elicitor protein. Using affinity chromatography, the His-tagged PaNie<sub>213</sub> was purified and assayed for its elicitor activity in suspension-cultured carrot cells and by infiltration into leaves of dicotyledones *Arabidopsis*, tobacco (*Nicotiana tabacum*), tomato, and monocotyledons maize (*Zea mays*), oat (*Avena sativa*), and *Tradescantia zebrina*.

With the purified PaNie<sub>213</sub> in hand, we were able to show that a single pure elicitor protein is sufficient to trigger multiple defense pathways.

## RESULTS

To study elicitor-receptor interactions and the link to downstream defense reactions, a pure elicitor protein is necessary. Therefore, heterologous expression and purification of the elicitor from *P. aphanidermatum* was initiated.

### Heterologous Expression of the His-Tagged Protein Elicitor from *P. aphanidermatum* (PaNie<sub>213</sub>)

The elicitor protein was purified from the culture medium of *P. aphanidermatum* with preparative SDS-PAGE as the final step. Because it was blocked at its N terminus, the protein was proteolytically digested and the released oligopeptides were microsequenced. On the basis of these sequences, degenerated primers were used to screen a cDNA library from *P. aphanidermatum*. The amino acid sequence is illustrated in Figure 1. By analyzing the sequence according to Nielsen et al. (1997), we can predict a putative eukaryotic secretion signal that is not present in PaNie<sub>213</sub> and also reveal a putative proteinase cleavage site. This deduced amino acid sequence has no predicted transmembrane domain (Frishman and Argos, 1996). We ruled out the existence of a glycosyl residue using the DIG Glycan Double Labeling Kit (Boehringer Mannheim, Mann-

|            |            |            |            |            |     |
|------------|------------|------------|------------|------------|-----|
| MVRFVLSALL | AAAGVLAATH | AAVINKDAVF | VWQPEFADA  | TQALAVRFRF | 50  |
| CCCHHHHHH  | HHCCCCCC   | EEEECCCC   | CCCCCCCC   | HHHHHHHH   |     |
| GLDVFVCCQF | YFAVDPQHT  | SGLKFPSSQ  | AAACRMSKA  | QVTSRSQTH  | 100 |
| CEEEEECCC  | CCCCCCCC   | CCCCCCCC   | HHHHHHHH   | CCCCCCCC   |     |
| GTTADTSTW  | MPKDSPTGI  | GRKRWENVV  | VLDNAASAN  | IVALSASAS  | 150 |
| EEEEEECCC  | CCCCCCCC   | CCCCCCCC   | EEEECCCC   | HHHHHHHH   |     |
| GYNKSPFADK | SYLDGITAKI | STKSTWFLD  | ELGFTTSAGK | QQPLIQEQL  | 200 |
| CCCCCCCC   | CCCCCCCC   | EEEECCCC   | CCCCCCCC   | CCCCCCCC   |     |
| TQAARDALES | TDGQNAVVF  | KSNFQKLVK  | AFYQ       |            | 234 |
| HHHHHHHHH  | CCCCCCCC   | CCCHHHHH   | HDC        |            |     |

**Figure 1.** Amino acid sequence of PaNie<sub>234</sub> in the one letter code. A predicted secondary structure is given in the lower line (Frishman and Argos, 1996). H, Alpha helix; C, random coiled; E, extended strands; the arrowhead points to a proteinase cleavage site at the end of the eukaryotic secretory signal sequence (Nielsen et al., 1997). Underlined, Microsequenced oligopeptides; shadowed box, amino acid sequence used for degenerated primer (pep2rev) design.

heim, Germany; data not shown). In Table I, the sequence of PaNie<sub>234</sub> was compared with sequences in the National Center for Biotechnology Information database. Similar proteins with 70% to 84% similarity were found with *F. oxysporum* cv *erythroxyli* (accession no. AAC97382), *P. sojae* (accession no. AAK01636), *P. parasitica* (accession no. AAK19753), *P. infestans* (accession no. AAK25828), and the eubacterium *B. halodurans* (accession no. BAB04114). This may represent a novel family of elicitor proteins.

Appropriate oligopeptides were synthesized as antigens to raise an antiserum against the protein elicitor. In Figure 2, the heterologous expression and purification of PaNie<sub>213</sub> is followed by SDS-PAGE and western blotting. The antiserum detects a single band after the final purification step.

The heterologous expression of C-terminal His-tagged PaNie<sub>213</sub> in *E. coli* and purification using nickel-nitrilotriacetic acid agarose (Ni-NTA) resulted in a 25-kD protein that is the functional and mature part of the total PaNie<sub>234</sub> secreted by the oomycete *P. aphanidermatum* into the culture medium. Purification leads to a single protein band with a molecular mass of 25 kD.

### Genomic Organization

DNA gel blotting was performed to provide information on genomic organization (Fig. 3). Genomic DNA of *P. aphanidermatum* was digested with various combinations of restriction enzymes and probed with a cDNA clone containing the total ORF from PaNie<sub>213</sub>. The restriction enzymes used for digestions are not blocked by methylation sites on the DNA. Two strong bands were always present in all four lanes regardless of the enzyme combinations used. This is an indication that a multicopy gene is present, provided that no intron with a cleavage site exists. The absence of introns was demonstrated by comparing the product length after PCR on genomic DNA and cDNA. The resulting two molecules had identical lengths (data not shown).

**Table I.** Comparison of deduced amino acid sequences of PaNie<sub>234</sub> with other necrosis-inducing elicitor proteins

| Elicitor Proteins                                                                       | Similarity in % to PaNie <sub>234</sub> |
|-----------------------------------------------------------------------------------------|-----------------------------------------|
| <i>P. aphanidermatum</i> (25-kD protein elicitor)                                       | 100.0                                   |
| <i>Phytophthora infestans</i> (necrosis-inducing protein NPP1)                          | 84.2                                    |
| <i>P. parasitica</i> (necrosis-inducing protein NPP1)                                   | 83.8                                    |
| <i>P. sojae</i> (necrosis-inducing peptide)                                             | 83.1                                    |
| <i>Bacillus halodurans</i> <sup>a</sup> (necrosis- and ethylene-inducing protein)       | 78.2                                    |
| <i>F. oxysporum</i> f. sp. <i>erythroxyli</i> (necrosis- and ethylene-inducing peptide) | 70.4                                    |

<sup>a</sup> Translated open reading frame (ORF) only; no activity assays were performed.

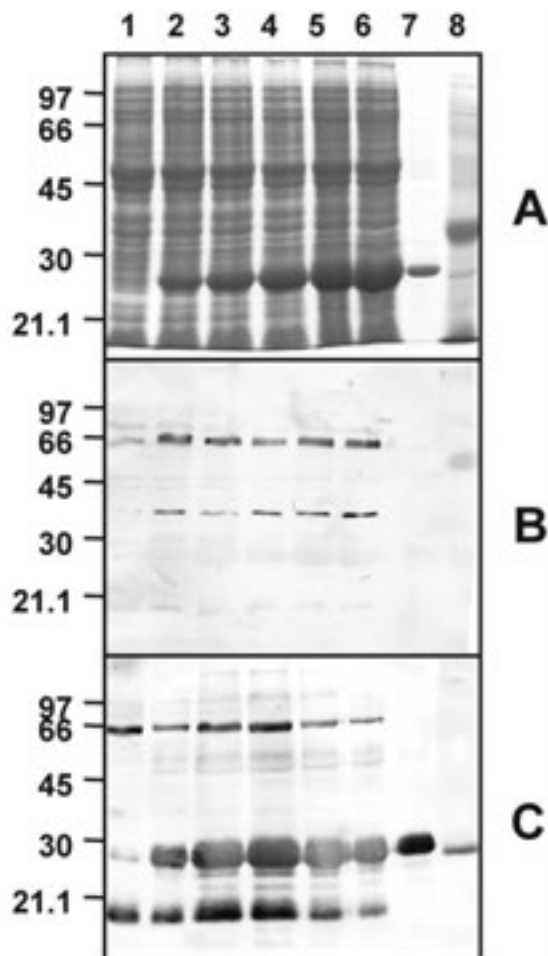

**Figure 2.** SDS-PAGE of fractions from purification of heterologously expressed C-terminal His-tagged PaNie<sub>213</sub> in *E. coli* in comparison to the crude elicitor. A, Coomassie Blue-stained SDS-PAGE. Lane 1, Control; lanes 2 through 6, 1 to 5 h after induction with isopropylthio- $\beta$ -galactoside; lane 7, purified PaNie<sub>213</sub>; lane 8, crude elicitor. B, Hybridization with pre-immuneserum (1:500); C, hybridization with PaNie<sub>213</sub> antiserum (1:20,000).

### Defense-Related Responses of Carrot Cell Cultures

To show that PaNie<sub>213</sub>, a single pure elicitor protein, is sufficient to trigger multiple defense reactions, carrot cell cultures were treated with PaNie<sub>213</sub>. As can be seen in Figure 4A, the viability decreased rapidly within the first 30 min after elicitor application. This time course is nearly identical with that observed with a  $(\text{NH}_4)_2\text{SO}_4$ -precipitated crude elicitor described previously (Koch et al., 1998). PaNie<sub>213</sub> was active at very low protein concentrations, inducing marked viability losses ( $\text{IC}_{50} = 50 \text{ nM}$ ) and the accumulation of large amounts of 4-HBA (data not shown). However, to obtain maximum effects in the experiments depicted in Figure 4, final concentrations of 500 nM were applied.

The accumulation of 4-HBA was determined (Fig. 4B). As already demonstrated for the crude elicitor preparation (Schnitzler and Seitz, 1989; Koch et al.,



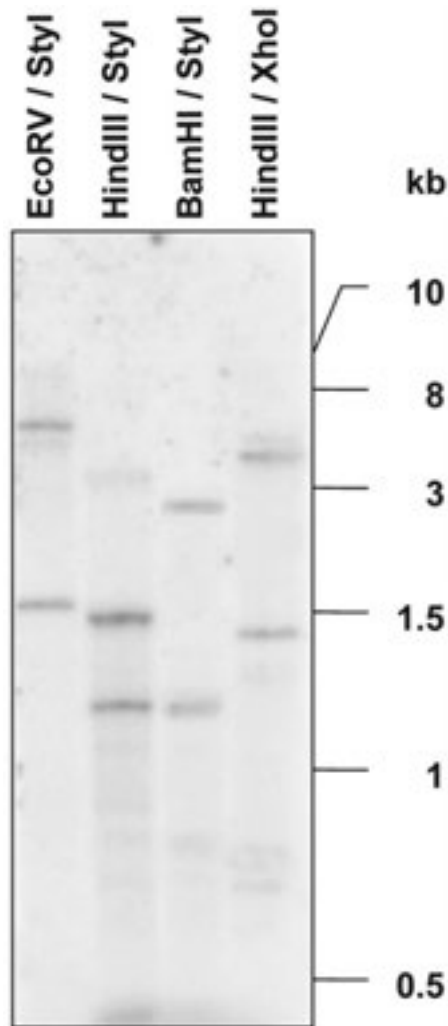

**Figure 3.** Southern-blot analysis of genomic DNA from *P. aphani-dermatum*. Each of 30  $\mu\text{g}$  of DNA was digested with the enzyme combination indicated and then separated on a 0.8% (w/v) agarose gel. The blot was probed with  $^{32}\text{P}$ -labeled PaNie<sub>213</sub> ORF cDNA. The blots were washed with 0.1% (w/v) SDS and  $0.2\times$  SSC at 65°C.

1998), the pure PaNie<sub>213</sub> also enhanced the accumulation of 4-HBA. Sixteen hours after the application of PaNie<sub>213</sub> to carrot cells, 4-HBA was accumulated rapidly. As already shown previously, this process is preceded by an increase of PAL-mRNA (Koch et al., 1998). As previously shown, the 4-HBA could only be released from the carrot cell wall by alkaline hydrolysis indicating a covalent linkage of this compound to wall constituents (Schnitzler and Seitz, 1989). These results demonstrate that the pure elicitor and the crude preparation induce the same responses.

#### PaNie<sub>213</sub>-Induced Chromatin Fragmentation

The fragmentation of nDNA is one of the best established criterion for confirming an elicitor-dependent programmed cell death during the hyper-

sensitive response (Peitsch et al., 1993; Ryerson and Heath, 1996). Therefore, we isolated protoplasts from cultured carrot cells and treated them with PaNie<sub>213</sub>. These protoplasts responded to the pure elicitor protein PaNie<sub>213</sub> in the same way that they did to the crude preparation, as described previously. In Figure 5, DNA laddering after treatment with PaNie<sub>213</sub> is shown. The fragmentation of chromatin to multiples of 180 bp is already visible 48 h after the onset of elicitation and continues during the next 48 h. As shown by Koch et al. (1998), this active chromatin fragmentation is dependent on the import of external  $\text{Ca}^{2+}$ , as was shown in a previous communication. G-proteins are involved in this active process as is shown by the fact that mastoparan and Mas-7 incubation mimic the elicitor effect (Koch et al., 1998).

#### PaNie<sub>213</sub> Treatment of Intact Plants

To study the effects of the pure elicitor protein on intact plant organs of genetically well defined sys-

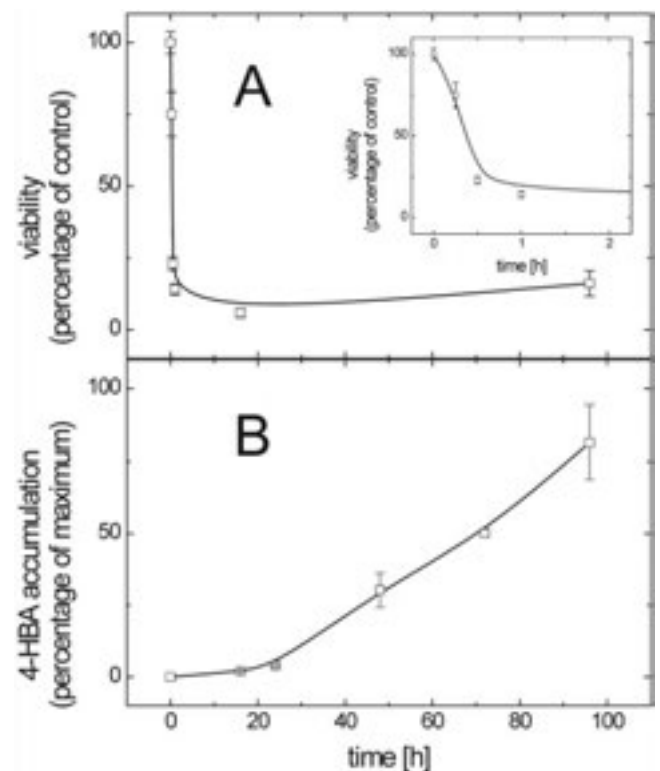

**Figure 4.** Time courses of elicitor-induced (500 nM PaNie<sub>213</sub>) viability changes and accumulation of 4-HBA in suspension-cultured carrot cells. A, The viability was monitored using the tetrazolium-assay and expressed as percentage of control (untreated cells). The inset shows the data for the first 2 h with an enlarged abscissa. B, Accumulation of cell wall-bound 4-HBA. Phenolic acids were released by saponification with 1 M NaOH from crude cell wall preparations and separated by HPLC (ODS Hypersil with a linear gradient of water: acetic acid (95:5; v/v) and methanol ranging from 10% to 50% (v/v) methanol over 30 min. 4-HBA was detected at 260 nm. The 4-HBA concentration is expressed as percentage of the highest accumulation of 4-HBA (100% = 10.6  $\mu\text{g}$   $\text{mg}^{-1}$  cell wall carbohydrates). Each data point represents the average of triplicates. Error bars represent SD.

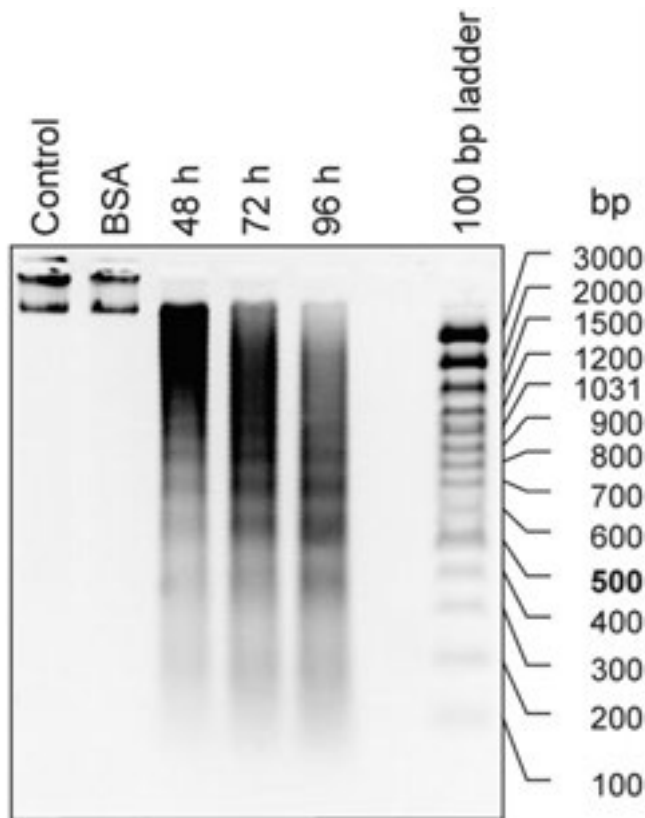

**Figure 5.** Elicitor-induced fragmentation of nDNA in protoplasts derived from suspension-cultured cell cultures of carrot. The DNA was extracted from protoplast at the indicated times and equal amounts were separated on a 1.2% (w/v) agarose gel and stained with ethidium bromide. The concentration of PaNie<sub>213</sub> was 100 nM. In the controls, water or equal bovine serum albumin (BSA) concentrations were applied.

tems, we treated leaves of *Arabidopsis* (Columbia-0 [Col-0], wild type [WT]), tobacco (W38; WT), and maize. In the first series (Fig. 6A), 5  $\mu$ L of a PaNie<sub>213</sub> solution (10  $\mu$ M) was infiltrated into the intercellular space of *Arabidopsis* leaves through stomatal pores. This treatment resulted in the formation of clearly defined necrotic areas at the infiltration site (see also Fig. 7). The necrotic area is bordered by a ring of callose deposition on mesophyll cell walls (Fig. 6A). At lower elicitor concentrations (1  $\mu$ M), no necrotic effects were observed; in contrast to the reaction seen at higher concentrations, callose is present only in a diffuse pattern (Fig. 6B). Equimolar protein concentrations of bovine serum albumin had no effect (Fig. 6C). The same is true for incubation with the corresponding buffer (data not shown).

In an additional series of experiments, the reactions of different plant species to PaNie<sub>213</sub> were compared. Infiltration of a 10- $\mu$ M elicitor solution into *Arabidopsis* leaves resulted in strong necrotic effects (Fig. 7), as did infiltration into tobacco, which responded more rapidly, already forming necrotic lesions after

6 h (data not shown). Tomato showed also necrotic lesions. Infiltration of maize failed to lead to a reaction even 72 h after the onset of elicitation (Fig. 7). Other monocotyledons like *Avena sativa* and *T. zebryna* (Bosse) also show no response to elicitation.

## DISCUSSION

Here, we report a novel protein elicitor from the culture medium of the pathogenic oomycete *P. aphanidermatum* that triggers an array of defense responses in carrot cell cultures and in intact plants of *Arabidopsis* and tobacco.

The protein was purified by preparative SDS-PAGE (Koch et al., 1998). Sequence comparison of proteins in the National Center for Biotechnology Information database yielded similar sequences for various phytopathogenic fungi and the eubacterium *B. halodurans* (only the sequence was published but no physiological function of the deduced protein was described; see Table I) indicating a conserved gene family. Such a gene must have an indispensable function in the pathogen; otherwise, it would have been eliminated during evolution. Analysis of the genomic organization of *P. aphanidermatum* using Southern blot presents strong evidence for the existence of at least two copies of the PaNie gene.

To find the smallest peptide with elicitor activity, N-terminal truncated cDNAs missing 63 or 106 amino acids were expressed in *E. coli*. Both products did not show any elicitor activity in carrot cell cultures with regard to 4-HBA accumulation and loss of viability (data not shown). Because all attempts to produce C-terminal truncated peptides proved to be unsuccessful and therefore no physiological assays concerning elicitor activity of these truncated peptides could be performed. These experiments revealed that the entire PaNie<sub>213</sub> is necessary for elicitor activity, suggesting that the intact secondary structure must be preserved for its activity. This is in contrast to the Pep-13 from *P. sojae* in which the elicitor active peptide was only 13 amino acids (Hahlbrock et al., 1995).

Rapid loss of viability and the induction of 4-HBA accumulation clearly demonstrates that a single protein elicitor (PaNie<sub>213</sub>) is sufficient to trigger both defense responses, namely programmed cell death and phytoalexin synthesis in suspension-cultured carrot cells.

This apparent contradiction between viability loss and the concomitant induction of de novo synthesis of 4-HBA suggests that the remaining viable cells have greatly elevated 4-HBA biosynthetic activity. In an earlier paper, we demonstrated that the transcription of PAL-mRNA proceeded even after cell death was initiated (Koch et al., 1998). Dying cells presumably can still be active 4-HBA producers. It has been shown for *Lactuca sativa* after infection with *Bremia lactucae* that dying cells are still able to synthesize

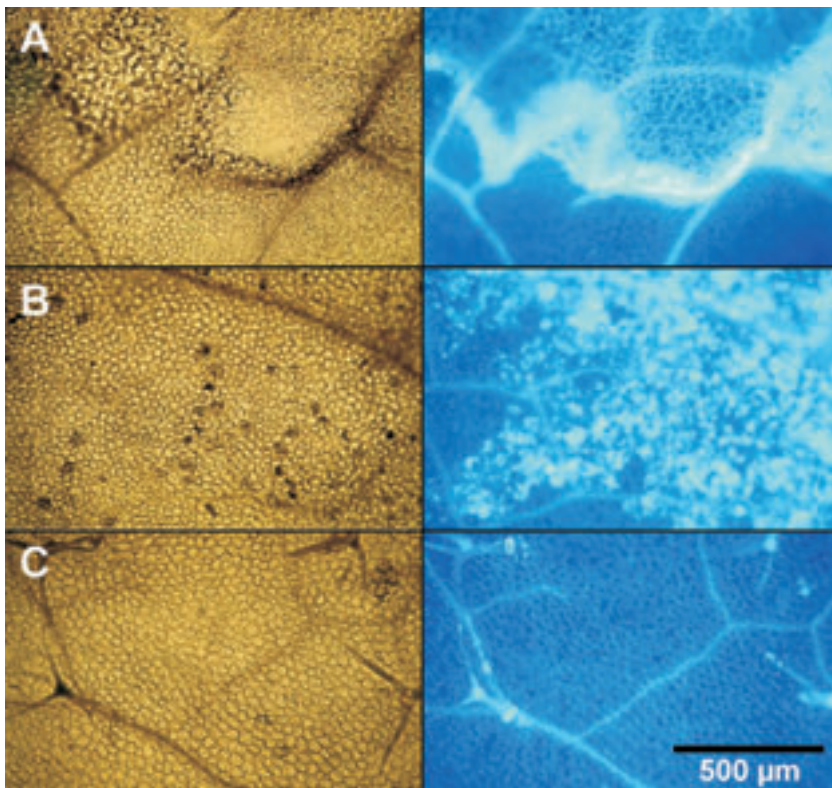

**Figure 6.** Elicitor-induced callose deposition in leaves of *Arabidopsis* (Col-0, WT). The 3-week-old leaves were infiltrated using a 1-mL syringe without a needle through stomatal pores with solutions of PaNie<sub>213</sub> (5  $\mu$ L of a 10- $\mu$ M or 1- $\mu$ M solution of PaNie<sub>213</sub>). As a control, equal concentration of BSA was applied. After an incubation period of 24 h, the chlorophyll was removed and the bleached leaves were stained with aniline blue and photographed in bright field (left) and under UV light (right). A, Ten micromolar PaNie<sub>213</sub>; B, 1  $\mu$ M PaNie<sub>213</sub>; C, BSA control.

defense-related compounds (Bennet et al., 1996). A second reasonable explanation would be that the tetrazolium assay as an indicator for initiated programmed cell death measures only the impairment of mitochondrial activity (Berridge and Tan, 1993).

A typical feature of programmed cell death is the digestion of the chromatin to nucleosomal fragments with multiples of 180 bp (Ryerson and Heath, 1996). Again, with the purified elicitor PaNie<sub>213</sub> we obtained a DNA laddering that was also observed with the crude elicitor preparation (Koch et al., 1998).

In addition to the elicitor-triggered defense response of the carrot cell culture, responses of intact plants to this novel elicitor protein were examined. As previously shown, carrot leaves respond to injections of the crude elicitor preparation by senescence at the leaf tips and by the accumulation of 4-HBA and other wall-bound phenols (Koch et al., 1998).

To broaden our understanding of the elicitor action PaNie<sub>213</sub> was applied to genetically well-defined systems like *Arabidopsis* and tobacco. Infiltration of *Arabidopsis* leaves resulted in necrotic lesions that are surrounded by a ring of cells with callose deposits at their cell walls. At the border of the necrosis, a higher concentration of brownish material was present that could be due to a reinforcement of these cell walls with wall-bound phenols. The callose deposits are thought to form a barrier between necrotic and healthy tissue (Vleeshouwers et al., 2000). It has been shown that 1,3-

$\beta$ -glucan synthase is merely activated by calcium and no de novo synthesis is necessary (for review, see Kauss, 1987).

These callose deposits appeared at a threshold concentration of 8 to 10  $\mu$ M. At lower elicitor concentrations, the callose was distributed in a diffuse manner (see Fig. 6B). Similar to carrot cells, *Arabidopsis* also seems to react with multiple responses. Preliminary infiltration experiments with elicited *Arabidopsis* leaves showed a dose-dependent increase in camalexin accumulation measured according to Tsuji et al. (1992) and Thomma et al. (1999) by fluorescence and UV light detection after thin-layer chromatography and HPLC separation (M. Malcherowitz, H.U. Seitz, unpublished data).

Tobacco leaves infiltrated with PaNie<sub>213</sub> also showed necroses. However, maize and other monocotyledons (see "Materials and Methods") did not respond to this treatment by forming necroses. This is an indication that dicotyledonous and monocotyledonous plants respond differently to protein elicitors, demonstrated here for PaNie<sub>213</sub>. This has raised the question whether monocotyledonous plants are unable to perceive the elicitor signal, at least as expressed by rapid cell death. Jennings et al. (2000) reported similar behavior after spraying various weed plants with a protein isolated from culture filtrates of *F. oxysporum*.

In summary, we present strong evidence here that a single pure elicitor protein is sufficient to trigger multiple defense reactions in the cell culture system



**Figure 7.** Comparison of effects of PaNie<sub>213</sub> (10  $\mu$ M) infiltrated (5  $\mu$ L) into leaves of *Arabidopsis* (Col-0; 3-week-old plants), tobacco (W38, WT, 4-month-old plants), and maize (1-week-old plants). Buffer and BSA were used as controls. For infiltration, see Figure 5. The photographs were taken 48 h after elicitation.

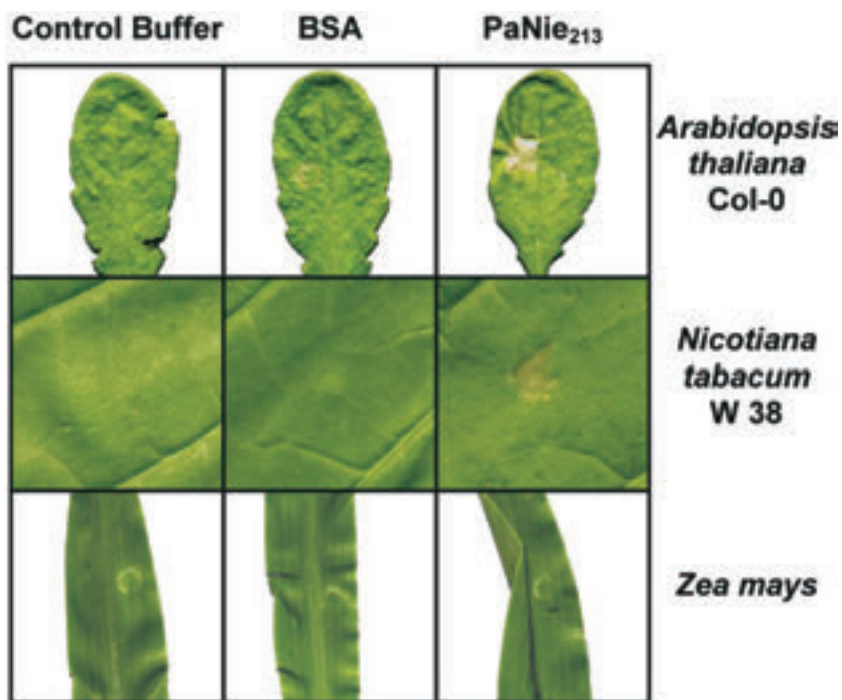

of carrot, *Arabidopsis*, and tobacco leaves. This study provides the basis for a better understanding of the recognition process and the causal connection with downstream signaling toward different defense reactions. The *Arabidopsis* system offers the possibility of taking a genetic approach to isolate a receptor protein and link it to the downstream signal pathway and the de novo synthesis of defense compounds.

## MATERIALS AND METHODS

### Culture Conditions for Cell Cultures of Carrot (*Daucus carota*) and for *Pythium aphanidermatum* (Edson) Fitzp.

Cell suspension cultures of carrot were cultivated as previously described (Noé et al., 1980). *P. aphanidermatum* was propagated in liquid media as previously described (Schnitzler and Seitz, 1989).

### Treatment of Carrot Protoplasts with PaNie<sub>213</sub> and Isolation of Genomic DNA (DNA Laddering)

The protoplasts were isolated from carrot cell cultures with a protocol described previously (Koch et al., 1998).

Purified protoplasts were counted in a Fuchs-Rosenthal hemacytometer. The suspension was brought to a cell titer of  $2 \times 10^5$  protoplasts  $\text{mL}^{-1}$ . The samples were incubated in aliquots of 10 mL in petri dishes at 26°C. The elicitor was applied directly after protoplast isolation.

After the incubation with PaNie<sub>213</sub>, the protoplasts were collected at 100g for 5 min and the supernatant was discarded. Lysis buffer (500  $\mu$ L containing 100 mM Tris-

HCl, pH 8.0, 100 mM NaCl, 20 mM EDTA, 2% [w/v] SDS, and 0.1% [v/v] 2-mercaptoethanol) was added and the mixture was incubated for 10 min at 65°C. After extraction in phenol:chloroform:isoamyl-alcohol (25:24:1, v/v), the aqueous phase was precipitated with ethanol (0.1 volume 3 M sodium acetate and 2.5 volumes of ethanol). The DNA was dissolved in Tris-EDTA buffer to a final concentration of 0.5  $\mu\text{g} \times \mu\text{L}^{-1}$ . Equal amounts of DNA were separated on 1.2% (w/v) agarose gels by electrophoresis and stained with ethidium bromide.

### Screening of cDNA and Microsequencing

Microsequencing of a purified protein from *P. aphanidermatum* with elicitor activity (Koch et al., 1998) yielded sequences of oligopeptides (peptide1, N'-AVINXDAVPVX PQPEPADXT-C'; and peptide2, N'-LGFTTSAGKQQPL IQWEQMTQAARD-C') that were used to design a degenerated primer (degenerated primer derived from peptide2; pep2rev 5'-ATHCARTGGGARCARARGAC-3'). PCR (primer: pep2rev and T7 5'-GTAATACGACTCACTATA GGC-3') with cDNA from *P. aphanidermatum* as a template produced a 260-bp fragment which contained parts of the oligopeptide coding region. A second PCR on cDNA from *P. aphanidermatum* with pep2rev and a forward primer binds in front of the poly A tail (5'-GTCCACAGCACTTTACTGG-3') led to a fragment that was used as an [ $\alpha$ -<sup>32</sup>P]dCTP probe to screen a cDNA library of *P. aphanidermatum*. The cDNA library was established with the ZAP-cDNA Synthesis Kit (Stratagene, Heidelberg). A clone lacking the 5'-end was completed with 5'-Race (5'-Race System for Rapid Amplification of cDNA Ends, Version 2.0; GibcoBRL Life Technologies, Karlsruhe, Germany).

### Heterologous Expression and Purification of the His-Tagged PaNie<sub>213</sub>

The pQE60 expression vector (Qiagen, Hilden, Germany) containing the ORF coding for PaNie<sub>213</sub> was used for the heterologous expression of the elicitor protein with a C-terminal His tag in *Escherichia coli* (strain M15). An artificial translation initiation site was inserted using PCR-based mutagenesis, starting after the putative eukaryotic secretory signal sequence. This protein, coding for a protein of 213 amino acids, was designated PaNie<sub>213</sub>. For the PCR, we used the reverse primer 5'-GAGACCATGGCCGTGATCAACCATG-3' and the forward primer 5'-CTCTGGATCCCTGGAAAAACGCCTTACGAG-3'.

The following PCR conditions were chosen: 5 min at 94°C, cycling denaturation for 20 s at 94°C, annealing for 20 s at 56°C, and elongation for 90 s at 70°C using *Pyrococcus furiosus* DNA polymerase (Stratagene, La Jolla, CA).

Preparation and purification of PaNie<sub>213</sub> under denaturing conditions was performed using the batch purification protocol for QIAexpressionist Ni-NTA technology (Qiagen). Transformed *E. coli* cells from a 1-L batch were induced with isopropylthio- $\beta$ -galactoside (1 mM) for 4 h and then disrupted by ultrasonication (Micro Tip Sonifier B-12, Branson, Danbury, CT) in 20 mL of buffer B (Qiagen; 8 M urea, 0.1 M NaH<sub>2</sub>PO<sub>4</sub>, and 0.01 M Tris-HCl, pH 8.0). The lysate was added to 10 mL of Ni-NTA and incubated for 5 h at 4°C with gentle agitation. The matrix was washed three times stepwise with buffer C (urea; 0.1 M NaH<sub>2</sub>PO<sub>4</sub>, and 0.01 M Tris-HCl, pH 6.3) containing 20 mM imidazole with decreasing concentrations of urea (first step, 2 M; second step, 0.5 M; and third step, 0.1 M urea). Elution occurred following a final wash step (50 mM Na<sub>2</sub>HPO<sub>4</sub>/NaH<sub>2</sub>PO<sub>4</sub> buffer, pH 8.0, 300 mM NaCl, and 300 mM imidazole) with 20 mL of 6 M guanidine-HCl and 0.2 M acetic acid. The elicitor protein PaNie<sub>213</sub> was dialyzed against water. This protein was used for the elicitation of cell cultures and for infiltration into leaves.

### Isolation of Genomic DNA of *P. aphanidermatum* and Southern-Blot Analysis

Genomic DNA was isolated according to Dellaporta et al. (1983) from mycelium (10 g fresh weight) frozen in liquid nitrogen and ground with mortar and pestle. DNA samples (30  $\mu$ g) were digested with *Eco*R V and *Nde*I, *Hind*III and *Sty*I, *Bam*HI and *Sty*I, *Hind*III and *Xho*I. The products were fractionated on 0.8% (w/v) agarose gel and then transferred onto a Hybond-N(+) membrane (Amersham Pharmacia Biotech, Freiburg, Germany). The PaNie<sub>213</sub> ORF cDNA was labeled with [ $\alpha$ -<sup>32</sup>P]dCTP and used as a probe. Hybridization was performed at 55°C in 0.33 M NaH<sub>2</sub>PO<sub>4</sub>/Na<sub>2</sub>HPO<sub>4</sub>, pH 7.0, 1 mM EDTA, and 7% (w/v) SDS for 16 h. The membranes were washed for at least 20 min with 0.1% (w/v) SDS, 0.2 $\times$  SSC (20 $\times$  SSC = 3 M NaCl, 0.3 M sodium citrate, pH 7.5) at 65°C and then subjected to autoradiography.

### Preparation of the Antiserum and Immunoblotting

A synthetic oligopeptide (PaNIE<sub>201-214</sub>) was used for immunisation of a rabbit. The pre-immunesera and antisera were provided by BioTrend (Köln, Germany) and used for immunoblotting in a dilution of 1:20,000.

### Determination of 4-HBA

The 4-HBA content of carrot cell walls was determined as previously described (Schnitzler and Seitz, 1989). Vanillic acid was used as an internal standard for the quantification of the 4-HBA concentration.

### Tetrazolium Assay

The loss of viability of suspended carrot cells was measured at the indicated times after elicitor application. Relative viability was calculated as  $A_{555-655} \cdot \text{mg}^{-1}$  fresh weight using the tetrazolium assay according to Koch et al. (1998).

### In Situ Infiltration of Leaves with PaNie<sub>213</sub>

Plants were grown under constant greenhouse conditions (60% relative humidity, long day: 16 h at 22°C and 8 h at 18°C). Leaves of 3-week-old *Arabidopsis* plants (Col-0), 4-month-old tobacco (*Nicotiana tabacum*) plants (W38), tomato (*Lycopersicon esculentum* Mill.) plants, 1-week-old maize (*Zea mays*) plants, *Tradescantia zebrina* (Bosse) plants, and oat (*Avena sativa*) plants were infiltrated in situ with constant volumes (5  $\mu$ L) of PaNie<sub>213</sub> solutions. BSA and the corresponding buffer were used as controls. The solutions were injected into the intercellular space through the stomata pore using a 1-mL syringe without hypodermic needle. Leaves were harvested 24 h after infiltration to visualize callose deposition and after 48 h to monitor necrotic effects.

### Analysis of Callose Deposition

To visualize callose deposition, seedlings were treated and stained as described by Gómez-Gómez et al. (1999) according to Currier and Strugger (1956). The tissue was fixed overnight in 1% (v/v) glutaraldehyde, 5 mM citric acid, 90 mM Na<sub>2</sub>HPO<sub>4</sub> (pH 7.4). The chlorophyll was removed and the specimens were dehydrated in ethanol and afterward equilibrated in 67 mM K<sub>2</sub>HPO<sub>4</sub> (pH 12.0) and then stained for 1 h at room temperature in 0.1% (w/v) aniline blue dissolved in 67 mM K<sub>2</sub>HPO<sub>4</sub> (pH 12.0). The stained leaves were transferred to a microscopic slide in 70% (v/v) glycerol and 30% (v/v) staining solution and examined under UV epifluorescence (Zeiss, Axioplan, Oberkochen, Germany). The callose deposits were visible as pale-blue fluorescence.

Received April 12, 2001; returned for revision June 18, 2001; accepted July 20, 2001.



## LITERATURE CITED

- Bach M, Schnitzler J-P, Seitz HU** (1993) Elicitor-induced changes in  $\text{Ca}^{2+}$  influx,  $\text{K}^{+}$  efflux, and 4-hydroxybenzoic acid synthesis in protoplasts of *Daucus carota* L. *Plant Physiol* **103**: 407–412
- Bailey BA** (1995) Purification of a protein from culture filtrates of *Fusarium oxysporum* that induces ethylene and necrosis in leaves of *Erythroxylum coca*. *Phytopathology* **85**: 1250–1255
- Bennet M, Gallagher M, Fagg J, Bestwick C, Paul T, Beale M, Mansfield J** (1996) The hypersensitive reaction, membrane damage and accumulation of autofluorescent phenolics in lettuce cells challenged by *Bremia lactuca*. *Plant J* **9**: 851–855
- Berridge MV, Tan AS** (1993) Characterization of the cellular reduction of 3-(4,5)-dimethylthiazol-2-yl)-2,5-diphenyltetrazoliumbromide (MTT): subcellular localization, substrate dependence, and involvement of mitochondrial electron transport in MTT reduction. *Arch Biochem Biophys* **303**: 474–482
- Bruce RJ, West CA** (1989) Elicitation of lignin biosynthesis and isoperoxidase activity by pectic fragments in suspension cultures of castor bean. *Plant Physiol* **91**: 889–897
- Currier H, Strugger S** (1956) Aniline blue and fluorescence microscopy of callose in bulb scales of *Allium cepa* L. *Protoplasma* **45**: 552–559
- Dellaporta SL, Wood J, Hicks JB** (1983) A plant DNA-miniprep: version II. *Plant Mol Biol Res* **1**: 19–21
- Ebel J, Cosio EG** (1994) Elicitors of plant defense responses. *Int Rev Cytol* **148**: 1–36
- Felbrich G, Blume B, Brunner F, Hirt H, Kroj T, Ligterink W, Romanski A, Nürnberger T** (2000) *Phytophthora parasitica* elicitor-induced reactions in cells of *Petroselinum crispum*. *Plant Cell Physiol* **41**: 692–701
- Felix G, Duran JD, Volko S, Boller T** (1999) Plants have a sensitive perception system for the most conserved domain of bacterial flagellin. *Plant J* **18**: 265–276
- Frishman D, Argos P** (1996) Incorporation of non-local interactions in protein secondary structure prediction from the amino acid sequence. *Protein Eng* **9**: 133–142
- Gómez-Gómez L, Boller T** (2000) FLS2: an LRR Receptor-like kinase involved in the perception of the bacterial elicitor flagellin in *Arabidopsis*. *Mol Cell* **5**: 1003–1011
- Gómez-Gómez L, Felix G, Boller T** (1999) A single locus determines sensitivity to bacterial flagellin in *Arabidopsis thaliana*. *Plant J* **18**: 277–284
- Hahlbrock K, Scheel D, Logemann E, Nürnberger T, Paniske M, Reinold S, Sacks WR, Schmelzer E** (1995) Oligopeptide elicitor-mediated defense gene activation in cultured parsley cells. *Proc Natl Acad Sci USA* **92**: 4150–4157
- Hammond-Kosack KE, Jones JDG** (1996) Resistance gene-dependent plant defense responses. *Plant Cell* **8**: 1773–1791
- He YS, Huang H-C, Collmer A** (1993) *Pseudomonas syringae* pv. *syringae* Harpin<sub>Pss</sub>: a protein that is secreted via the Hrp pathway and elicits the hypersensitive response in plants. *Cell* **73**: 1255–1266
- Jennings JC, Apel-Birkhold PC, Bailey BA, Anderson JD** (2000) Induction of ethylene biosynthesis and necrosis in weed leaves by *Fusarium oxysporum* protein. *Weed Sci* **48**: 7–14
- Kauss H** (1987) Some aspects of calcium-dependent regulation in plant metabolism. *Annu Rev Plant Physiol* **38**: 47–72
- Koch W, Wagner C, Seitz HU** (1998) Elicitor-induced cell death and phytoalexin synthesis in *Daucus carota* L. *Planta* **206**: 523–532
- May MJ, Hammond-Kosack KE, Jones JDG** (1996) Involvement of reactive oxygen species, glutathione metabolism, and lipid peroxidation in the Cf-gene dependent defense response of tomato cotyledons induced by race specific elicitors of *Cladosporium fulvum*. *Plant Physiol* **110**: 1367–1379
- Mittler R, Simon L, Lam E** (1997) Pathogen-induced programmed cell death in tobacco. *J Cell Sci* **110**: 1333–1344
- Nennstiel D, Scheel D, Nürnberger T** (1998) Characterization and partial purification of an oligopeptide elicitor receptor from parsley (*Petroselinum crispum*). *FEBS Lett* **431**: 405–410
- Nielsen H, Engelbrecht J, Brunak S, von Heijne G** (1997) Identification of prokaryotic and eukaryotic signal peptides and prediction of their cleavage sites. *Protein Eng* **12**: 1–6
- Noé W, Langebartels C, Seitz HU** (1980) Anthocyanin accumulation and PAL activity in a suspension culture of *Daucus carota* L. Inhibition by L- $\alpha$ -aminooxy- $\beta$ -phenylpropionic acid and t-cinnamic acid. *Planta* **149**: 283–287
- Nürnberger T** (1999) Signal perception in plant pathogen defense. *Cell Mol Life Sci* **55**: 167–182
- Nürnberger T, Nennstiel D, Jabs T, Sacks WR, Hahlbrock K, Scheel D** (1994) High affinity binding of a fungal oligopeptide elicitor to parsley plasma membranes triggers multiple defense responses. *Cell* **78**: 449–460
- Peitsch MC, Polzar B, Stephan H, Crompton P, MacDonald HR, Manherz HG, Tschopp J** (1993) Characterization of the endogenous deoxyribonuclease involved in nuclear DNA degradation during apoptosis (programmed cell death). *EMBO J* **12**: 371–377
- Ponchet M, Panabières F, Milat M-L, Mikes V, Montillet J-L, Suty L, Triantaphylides C, Tirilly Y, Blein J-P** (1999) Are elicitors cryptograms in plant-oomycete communications? *Cell Mol Life Sci* **56**: 1020–1047
- Ryerson DE, Heath MC** (1996) Cleavage of nuclear DNA into oligosomal fragments during cell death induced by fungal infection or by abiotic treatments. *Plant Cell* **8**: 393–402
- Schnitzler J-P** (1992) Die Karotte Ein Modellsystem für Untersuchungen von Pflanze-Pathogen-Wechselwirkungen: Charakterisierung von pilzlichen Elicitoren, Isolierung elicitorreaktiver Protoplasten, Biosynthese der p-Hydroxybenzoesäure. PhD thesis. University of Tübingen, Germany
- Schnitzler J-P, Seitz HU** (1989) Rapid responses of cultured carrot cells and protoplasts to an elicitor from the cell wall of *Pythium aphanidermatum* (Edson) Fitzp. *Z Naturforsch* **44**: 1020–1028

**Thomma BPHJ, Nelissen I, Eggermont K, Broekaert WF** (1999) Deficiency in phytoalexin production causes enhanced susceptibility of *Arabidopsis thaliana* to the fungus *Alternaria brassicicola*. *Plant J* **19**: 163–171

**Tsuji J, Jackson EP, Gage DA, Hammerschmidt R, Somerville SC** (1992) Phytoalexin accumulation in *Arabidopsis thaliana* during hypersensitive reaction to *Pseudomonas syringae* pv *syringae*. *Plant Physiol* **98**: 1304–1309

**Vleeshouwers VGAA, van Dooijeweert W, Govers F, Kammoun S, Colon LT** (2000) The hypersensitive response is associated with host and nonhost resistance to *Phytophthora infestans*. *Planta* **210**: 853–846

**Wei Z-M, Laby RJ, Zunoff CH, Bauer DW, He YS, Colmer A, Beer SV** (1992) Harpin, elicitor of the hypersensitive response produced by the plant pathogen *Erwinia amylovora*. *Science* **257**: 85–88
